# Supplementary material for: Excellent thermomagnetic power generation for harvesting waste heat via a second-order ferromagnetic transition
Source: Royal Society of Chemistry journal article supplement (doi:10.1039/d3mh02225k), 2024-01-01
Supplement: d3mh02225k5.pdf [file d3mh02225k5.pdf]

1 Supplementary Information for

2 **Excellent Thermomagnetic Power Generation for Harvesting Waste**  
3 **Heat via a Second-order Ferromagnetic Transition**

4

5 *Haodong Chen, Xianliang Liu, Yao Liu, Longlong Xie, Ziyuan Yu, Kaiming Qiao,*  
6 *Mingze Liu, Fengxia Hu, Baogen Shen, R. V. Ramanujan, Ke Chu, Hu Zhang\**

7

8 Haodong Chen, Xianliang Liu, Longlong Xie, Ziyuan Yu, Kaiming Qiao, Mingze Liu,  
9 Prof. Hu Zhang

10 School of Materials Science and Engineering

11 University of Science and Technology of Beijing

12 Beijing 100083, P R China

13 E-mail: [zhanghu@ustb.edu.cn](mailto:zhanghu@ustb.edu.cn)

14

15 A.P. Yao Liu

16 Frontier Institute of Science and Technology

17 Xi'an Jiaotong University

18 Xi'an 710049, P R China

19 E-mail: [liuyao12@xjtu.edu.cn](mailto:liuyao12@xjtu.edu.cn)

20

21 Prof. Fengxia Hu, Prof. Baogen Shen

22 Beijing National Laboratory for Condensed Matter Physics

23 Institute of Physics, Chinese Academy of Sciences

24 Beijing 100190, P R China

25 E-mail: [fxhu@iphy.ac.cn](mailto:fxhu@iphy.ac.cn); [shenbg@iphy.ac.cn](mailto:shenbg@iphy.ac.cn)

26

27 Prof. R. V. Ramanujan

28 School of Materials Science and Engineering

---

\*Corresponding author at: School of Materials Science and Engineering, University of Science and Technology

Beijing, Beijing, 100083, China. Tel.: +86-10-62333733.

E-mail address: [zhanghu@ustb.edu.cn](mailto:zhanghu@ustb.edu.cn)

1 Nanyang Technological University

2 Singapore 639798, Singapore

3 E-mail: [Ramanujan@ntu.edu.sg](mailto:Ramanujan@ntu.edu.sg)

4

5 Prof. Ke Chu

6 School of Materials Science and Engineering

7 Lanzhou Jiaotong University

8 Lanzhou 730070, P R China

9 E-mail:

[chukelut@163.com](mailto:chukelut@163.com)

## 10 Supplementary Notes

### 11 Supplementary Note 1. Magnetization change rate $dM/dT$

12 Fig. S1 shows the magnetization change rate ( $dM/dT$ ) derived from the  $M-T$  curves  
13 for (a) Co12.5, (b) Co14, and (c) NiMnIn, respectively. The  $dM/dT$  peak values of  
14 Co12.5, Co14, and NiMnIn alloys are  $1.7 \text{ Am}^2 \text{ kg}^{-1} \text{ K}^{-1}$ ,  $4.85 \text{ Am}^2 \text{ kg}^{-1} \text{ K}^{-1}$ , and  $-1.78$   
15  $\text{Am}^2 \text{ kg}^{-1} \text{ K}^{-1}$  during the heating process, and  $1.34 \text{ Am}^2 \text{ kg}^{-1} \text{ K}^{-1}$ ,  $3.61 \text{ Am}^2 \text{ kg}^{-1} \text{ K}^{-1}$ ,  
16 and  $-1.78 \text{ Am}^2 \text{ kg}^{-1} \text{ K}^{-1}$  during the cooling process, respectively. For Co12.5 and Co14  
17 alloys, the first-order magnetic transition (FOMT) results in a significant change of  
18 magnetization, but a distinct difference in the  $dM/dT$  peak values during heating and  
19 cooling can be observed, e.g., the difference between the  $dM/dT$  peaks during heating  
20 and cooling is as high as 27% for Co12.5 and 34% for Co14, respectively. Such a large  
21 difference is attributed to the thermal hysteresis accompanied with FOMT.

22 Thermal hysteresis of up to 14 K and 10 K is found during the FOMT martensitic  
23 transition for Co12.5 and Co14 alloys, respectively. This large thermal hysteresis not  
24 only causes the different  $dM/dT$  values, but also introduces variability in the operating  
25 temperature during heating and cooling, which causes difficulties in TMG design and  
26 degradation of TMG performance.<sup>1-2</sup> On the contrary, the second-order magnetic  
27 transition (SOMT) in NiMnIn alloy exhibits a perfectly reversible ferromagnetic (FM)  
28 to paramagnetic (PM) transition in the working temperature range without thermal  
29 hysteresis. The maximum  $dM/dT$  peak value of SOMT in NiMnIn alloy is even larger  
30 than the one of FOMT in Co12.5 alloy. This result indicates that the SOMT in NiMnIn  
31 alloy can have better TMG performance than that of FOMT in Heusler alloys.

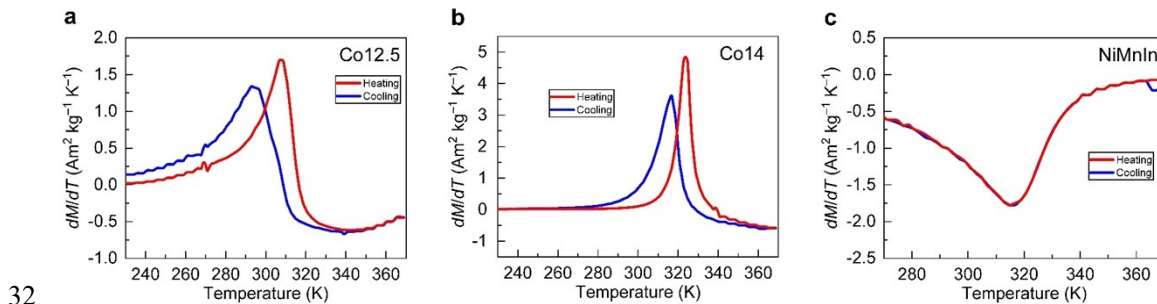

33 **Fig. S1** The  $dM/dT$  derived from the  $M-T$  curves for (a) Co12.5, (b) Co14, and (c) NiMnIn,  
34 respectively.

## 35 **Supplementary Note 2. Transmission electron microscopy of Co14**

36 To gain deeper insights into the microstructure of the Heusler alloys with a first-  
37 order ferromagnetic martensitic transition around room temperature, transmission  
38 electron microscopy (TEM) was carried out. Fig. S2a shows the bright-field TEM  
39 image of Co14 alloy at room temperature. Fig. S2b and S2c show the fast Fourier  
40 transform (FFT) patterns for the regions A and M, respectively. These FFT patterns  
41 indicate that the phases in regions A and M are austenite and martensite, respectively.  
42 This result reveals that both martensite and austenite phases coexist in Co14 alloy at  
43 room temperature, confirming that the first-order ferromagnetic martensitic transition  
44 occurs around room temperature.

45 Fig. S2d displays the high-resolution transmission electron microscopy (HRTEM)  
46 image for the martensite phase. It is seen that the martensite shows a specific stacking-  
47 mediated structure with locally different stacking periodicities at nano scale, which  
48 confirms the modulated structure of the martensite, and this finding is consistent with  
49 the XRD analysis. Each stacking periodicity is composed of different number of atomic  
50 layers. The formation of the stacking-mediated structure is attributed to the similar free  
51 energies of the martensites with different stacking periodicities.<sup>3</sup>

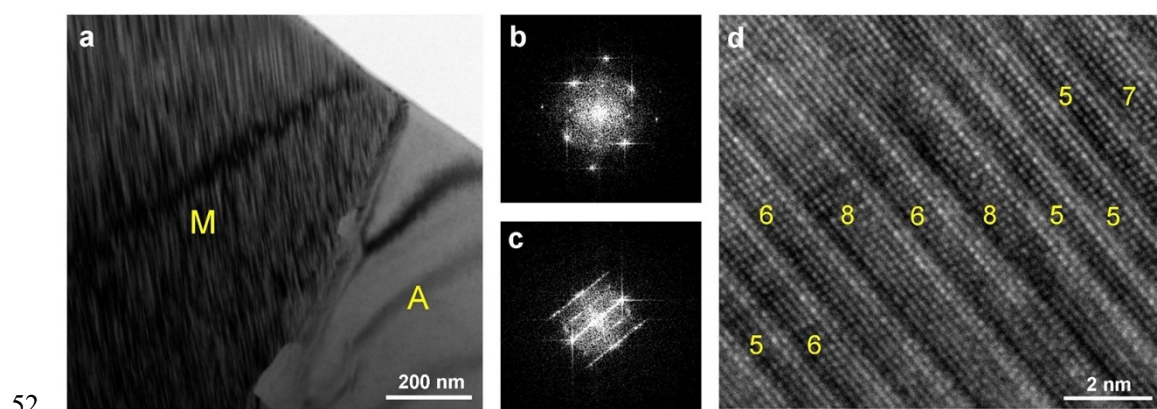

52  
53 **Fig. S2** (a) Bright-field image for an area with coexisting austenite and martensite in the Co14 alloy.  
54 (b) Fast Fourier transform (FFT) pattern for the region A. (c) FFT pattern for the region M. (d)  
55 High-resolution transmission electron microscopy (HRTEM) image for martensite. The numbers  
56 represent the number of atomic layers contained in each stacking periodicity.

57

58

### 59 Supplementary Note 3. Magnetocaloric effect (MCE)

60 Fig. S3a and S3b show the isothermal magnetization ( $M-H$ ) curves for Co12.5 and  
 61 Co14 alloys around their FOMT. Fig. S3c shows the  $M-H$  curves for NiMnIn around  
 62 its SOMT. The magnetization of both Co12.5 and Co14 alloys increases with increasing  
 63 temperature. With higher field they experience a field-induced metamagnetic transition  
 64 from the weak magnetic state to the FM state with a distinct magnetic hysteresis around  
 65 the martensitic transition temperature, confirming that it is a FOMT.

66 On the other hand, the magnetization of NiMnIn decreases with an increase of  
 67 temperature around its  $T_C$ . Below the  $T_C$ , the magnetization increases rapidly at low  
 68 fields and tends to saturate with increasing field, corresponding to typical FM behavior.  
 69 Above the  $T_C$ , the magnetization increases linearly with higher field, indicating a PM  
 70 state. Moreover, no magnetic hysteresis is observed in these isotherms. The above facts  
 71 reveal that the NiMnIn undergoes a SOMT from the FM to the PM states.

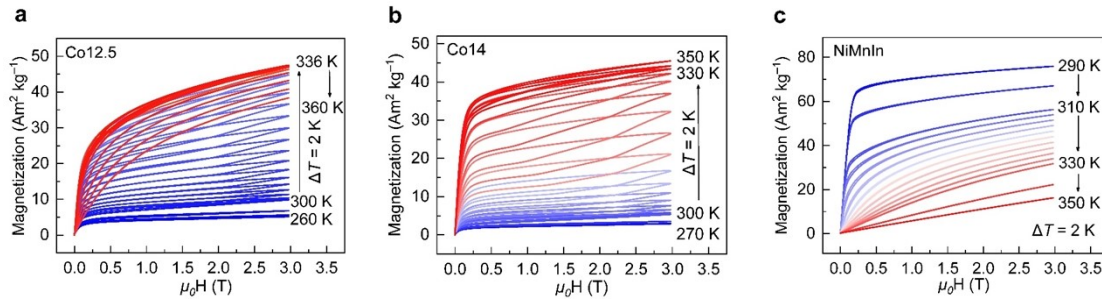

72  
 73 **Fig. S3** The isothermal magnetization ( $M-H$ ) curves near the martensitic transition for (a) Co12.5,  
 74 (b) Co14, and near the  $T_C$  for (c) NiMnIn, respectively.

75 Based on the above magnetization isotherms, the  $\Delta S_M$  values for various magnetic  
 76 field changes were calculated by the Maxwell relationship:<sup>4</sup>

$$77 \quad \Delta S_M(T, H) = \mu_0 \int_0^H \left( \frac{\partial M}{\partial T} \right)_H dH \quad (S1)$$

78 where  $\mu_0$  is the permeability of vacuum. In practice, the  $\Delta S_M$  value can be calculated  
 79 using the following numerical approximation:

$$80 \quad \Delta S_M(T, H) = \mu_0 \sum_i \frac{M_{i+1} - M_i}{T_{i+1} - T_i} \Delta H_i \quad (S2)$$

81 where  $M_i$  and  $M_{i+1}$  are the magnetization values at temperatures of  $T_i$  and  $T_{i+1}$  when the

82 magnetic field is  $H_i$ , respectively, and  $\Delta H_i$  is the change of the magnetic field.

83 Fig. S4 shows the temperature dependence of  $\Delta S_M$  under different magnetic field  
84 changes up to 3 T for Co12.5 and Co14 alloys around their FOMT and NiMnIn around  
85 its SOMT. Both Co12.5 and Co14 alloys show a sharp positive  $\Delta S_M$  peak due to the  
86 FOMT, and the peak  $\Delta S_M$  value for a field change of 3 T is  $4.17 \text{ J kg}^{-1} \text{ K}^{-1}$  for Co12.5  
87 and  $7.66 \text{ J kg}^{-1} \text{ K}^{-1}$  for Co14, respectively. An increase in Co content in a Ni-Mn-Ti  
88 based alloy would strengthen the first-order martensitic transition,<sup>5</sup> leading to higher  
89  $\Delta S_M$  as well as a narrower peak for Co14 alloy. In addition, a small negative  $\Delta S_M$  is  
90 found after the positive  $\Delta S_M$  peak in both alloys, which is attributed to the SOMT of  
91 austenite.<sup>6</sup>

92 In comparison, NiMnIn shows a wider negative  $\Delta S_M$  peak around its  $T_C$ . Usually,  
93 the  $\Delta S_M$  of SOMT is much lower than that of FOMT. However, the  $\Delta S_M$  of SOMT in  
94 NiMnIn is comparable to that of FOMT in Co12.5 and Co14 alloys, and it is even higher  
95 than those of Co12.5 and Co14 alloys at low magnetic fields. For example, the  $|\Delta S_M|$   
96 peak of NiMnIn reaches  $2.37 \text{ J kg}^{-1} \text{ K}^{-1}$  under 1 T, which is 2.21 and 1.06 times that of  
97 Co12.5 ( $1.07 \text{ J kg}^{-1} \text{ K}^{-1}$ ) and Co14 ( $2.23 \text{ J kg}^{-1} \text{ K}^{-1}$ ).

98 The maximum field supplied by permanent magnets is usually lower than 2 T.  
99 Therefore, it is desirable to search for materials with high MCE and TMG performance  
100 under low magnetic field. This large MCE of SOMT in NiMnIn under low magnetic  
101 fields suggests better TMG performance than that of the FOMT in Co12.5 and Co14  
102 alloys, satisfying the above requirement and displaying high potential for practical  
103 applications.

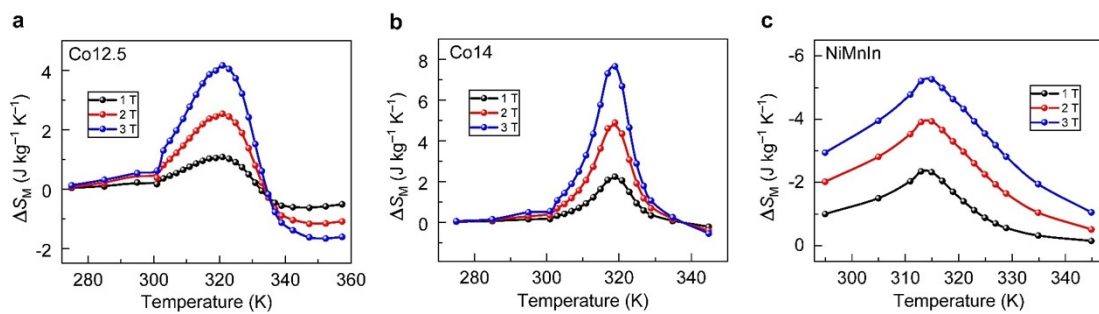

104  
105 **Fig. S4** Temperature dependence of  $\Delta S_M$  under different magnetic field changes up to 3 T for (a)  
106 Co12.5, (b) Co14 alloys around their FOMT and (c) NiMnIn around its SOMT.

## 107 Supplementary Note 4. Thermal properties of Heusler alloys

### 108 4.1 Heat capacity ( $C_P$ ) and thermal conductivity ( $\lambda$ )

109 Fig. S5 shows the temperature dependence of the heat capacity  $C_P$  under 1 T for  
110 (a) Co12.5, (b) Co14, and (c) NiMnIn, respectively. A  $C_P$  peak appears around their  
111 respective transition temperature. However, the Co12.5 and Co14 alloys show large  
112 thermal hysteresis due to the FOMT, resulting in different  $C_P$  values during heating and  
113 cooling. Such a difference in  $C_P$  values would cause differences in the rate of  
114 temperature change  $dT/dt$  as well as the TMG performance during heating and cooling  
115 process.

116 In comparison with above alloys, NiMnIn alloy has a lower  $C_P$  value with a  
117 maximum value of  $650 \text{ J kg}^{-1} \text{ K}^{-1}$  near its  $T_C$ , which would enhance the  $dT/dt$ .  
118 Moreover, there is no thermal hysteresis during the heating and cooling process,  
119 ensuring the consistency of working temperature and TMG performance during  
120 cycling.

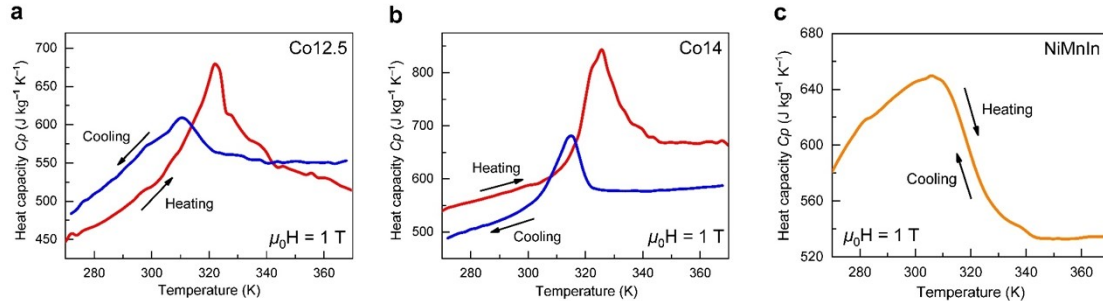

121

122 **Fig. S5** Temperature dependence of heat capacity  $C_P$  under 1 T for (a) Co12.5, (b) Co14, and  
123 NiMnIn, respectively.

124 Fig. S6 compares the temperature dependence of thermal conductivity  $\lambda$  for all the  
125 samples. The average thermal conductivity  $\lambda_{\text{ave}}$  of Co12.5, Co14 and NiMnIn alloys are  
126  $9.56 \text{ W m}^{-1} \text{ K}^{-1}$ ,  $9.39 \text{ W m}^{-1} \text{ K}^{-1}$ , and  $14.86 \text{ W m}^{-1} \text{ K}^{-1}$ , respectively. NiMnIn alloy  
127 has the highest  $\lambda_{\text{ave}}$  value, which is 1.55 and 1.58 times that of Co12.5 and Co14 alloys,  
128 respectively. This result indicates that NiMnIn alloy has the best heat transfer  
129 capability, which is also favorable for high TMG performance.

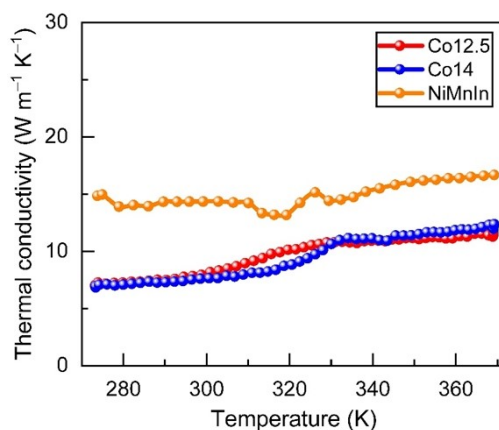

130

131 **Fig. S6** Temperature dependence of thermal conductivity  $\lambda$  for Co12.5, Co14, and NiMnIn alloys.

132 Our recent work reveals that the  $C_p$  and  $\lambda$  affect the TMG performance largely,  
 133 e.g., 10% change rate of  $C_p$  and  $\lambda$  would cause 2~4% change rate of induced current  $I$ .<sup>7</sup>  
 134 Here, the  $C_p$  of NiMnIn is ~30% lower than the maximum  $C_p$  of Co14, and the  $\lambda$  is  
 135 ~58% higher than the maximum  $\lambda$  of Co14 alloy. Therefore, the induced current  $I$  of  
 136 NiMnIn alloy would be probably 18%~36% higher than that of Co14 alloy. The  
 137 calculated result based on the experiential current shows that the  $I_{\max}$  of NiMnIn alloy  
 138 is 25.5% higher than that of Co14 alloy, consistent with above prediction. Besides, the  
 139 following study confirms that the  $I_{\max}$  of 286.6  $\mu\text{A g}^{-1}$  generated by NiMnIn in present  
 140 work is 1–4 orders of magnitude higher than those of other works. To our knowledge,  
 141 this is the highest  $I_{\max}$  reported so far.

## 142 4.2. Calculation of average temperature ( $T_{\text{ave}}$ )

143 A thermocouple was attached to the sample surface to measure the temperature  
 144 change, Fig. 1e in the main paper shows the variation of measured temperature during  
 145 the heating and cooling cycling. The water temperature shows a steady cyclic change  
 146 between the hot-end and cold-end. The water temperature in the copper cabin reaches  
 147 ~289 K (cold-end) and ~369 K (hot-end) after passing through the pump and pipe; the  
 148 working temperature range of the TMG device is suitable for harvesting low-grade  
 149 waste heat. However, there is a temperature gradient from the surface to the center of  
 150 bulk sample. The isometric segmentation method<sup>2</sup> was used to calculate the average  
 151 sample temperature.



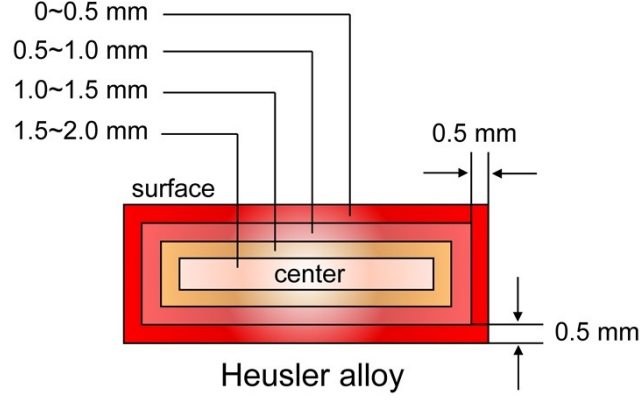

152  
153

**Fig. S7** Schematic diagram of the isometric segmentation method.

154 As shown in Fig. S7, the sample was divided with equal intervals of 0.5 mm from  
155 the surface to the center, the temperature of each part can be calculated using the  
156 following equations:<sup>2</sup>

157 
$$\alpha = \frac{\lambda}{\rho C_p} \quad (\text{S3})$$

158 
$$\eta = \frac{z}{2\sqrt{\alpha t}} \quad (\text{S4})$$

159 
$$\frac{T(z,t) - T_c}{T_h - T_c} = 1 - \frac{2}{\sqrt{\pi}} \int_0^\eta e^{-\tau^2} d\tau \quad (\text{S5})$$

160 where  $T(z,t)$  is the temperature at time  $t$ ,  $z$  is the distance from the sample surface,  $C_p$  is  
161 the heat capacity (Fig. S5),  $\lambda$  is the thermal conductivity (Fig. S6),  $\rho$  is the density of  
162 the sample,  $\tau$  is the time interval of 0.3 s,  $T_c$  is the cold-end temperature (289 K) and  $T_h$   
163 is the hot-end temperature (369 K).

164 Fig. S8 shows the calculated temperature of each part with time for Co<sub>12.5</sub>, Co<sub>14</sub>,  
165 and NiMnIn alloys, respectively. The temperature varies gradually from the surface to  
166 the center, confirming the existence of a temperature gradient in the bulk sample. Since  
167 the outermost layer contacts with the hot and cold fluids directly, the surface  
168 temperature changes much faster than the center temperature. The calculated  
169 temperature of the sample surface (0~0.5 mm) is consistent with the measured surface  
170 temperature (dash line), which verifies the calculation method. Then the average  
171 temperature of the bulk sample can be calculated using the equation:

172

$$T_{\text{ave}}(t) = \sum_{i=1}^5 T_i(t) \frac{V_i}{V} \quad (\text{S6})$$

173 where  $T_i(t)$  is the temperature of part  $i$ ,  $V_i$  and  $V$  are the volumes of part  $i$  and the whole  
 174 sample, respectively. The average temperature of the bulk sample is plotted as a dotted  
 175 dash line in Fig. S8.

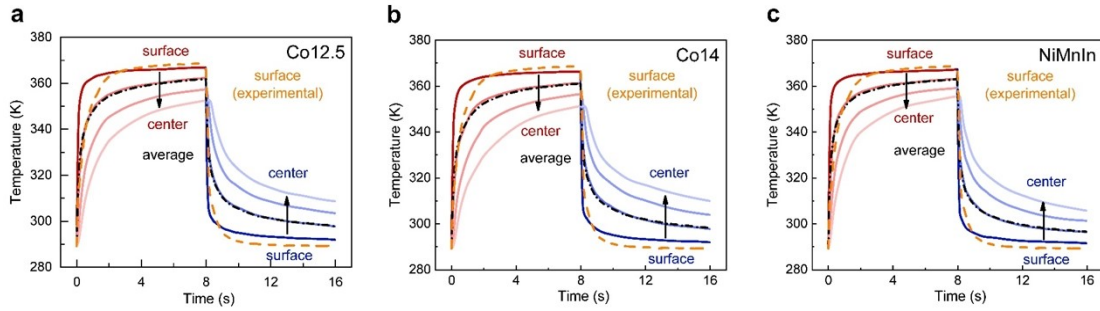

176

177 **Fig. S8** The calculated temperature of each part with time for (a) Co12.5, (b) Co14, and (c) NiMnIn,  
 178 respectively.

179 Fig. S9a shows the calculated  $T_{\text{ave}}-t$  curves during one cycle for all the samples.  
 180 The  $T_{\text{ave}}$  rises sharply from 289 K to  $\sim 350$  K within the first 2 s due to the large  
 181 temperature difference between the heating fluid and the sample. As the temperature  
 182 difference decreases, the  $T_{\text{ave}}$  rises slowly and reaches  $\sim 360$  K at 8 s. Similarly,  $T_{\text{ave}}$   
 183 drops drastically in the beginning during cooling, and then  $T_{\text{ave}}$  decreases slowly and  
 184 reaches  $\sim 360$  K at 16 s. Due to the large thermal hysteresis of FOMT, the transition  
 185 temperatures occur at different temperatures during heating and cooling for the Co12.5  
 186 and Co14 alloys, which is undesirable. Moreover, the reverse transition from austenite  
 187 to martensite cannot be completed during cooling within the TMG temperature range  
 188 in the Co12.5 alloy due to thermal hysteresis. This incomplete transition would cause a  
 189 lower induced power during the cooling. In contrast, the  $T_C$  of SOMT in NiMnIn  
 190 remains constant during the heating and cooling processes. In addition, due to the low  
 191  $C_p$  and high  $\lambda$ , NiMnIn alloy shows the fastest temperature change among all the  
 192 samples, which is favorable to obtaining large TMG performance.

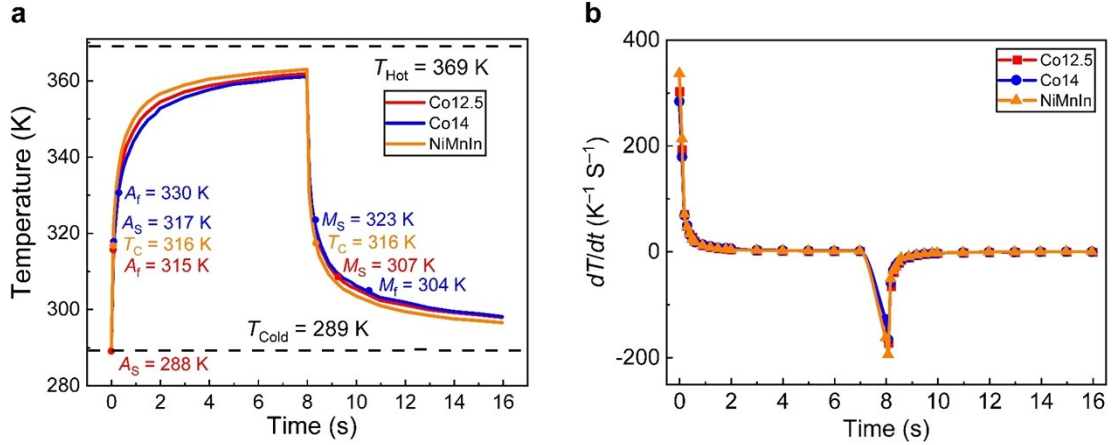

193

194 **Fig. S9** (a) The calculated average sample temperature during one cycle for Co12.5, Co14, and  
 195 NiMnIn, respectively. (b) The temperature change rate ( $dT/dt$ ) derived from the  $T-t$  curves for  
 196 Co12.5, Co14, and NiMnIn, respectively.

197 Fig. S9b shows the corresponding temperature change rate ( $dT/dt$ ) derived from the  
 198  $T_{ave}-t$  curves for all the alloys. The  $dT/dt$  peaks of Co12.5, Co14, and NiMnIn alloys  
 199 are 302.4  $K^{-1} S^{-1}$ , 284.2  $K^{-1} S^{-1}$ , and 336.9  $K^{-1} S^{-1}$  during the heating process, and  
 200  $-172.3 K^{-1} S^{-1}$ ,  $-166.9 K^{-1} S^{-1}$ , and  $-195.2 K^{-1} S^{-1}$  during the cooling process,  
 201 respectively. NiMnIn alloy has the fastest temperature change rate  $dT/dt$  among all the  
 202 alloys. Besides, the  $dT/dt$  values during heating are much higher than the corresponding  
 203 values during cooling. The initial sample temperature is 289 K and it is uniform for  
 204 bulk samples. However, the sample temperature cannot be uniform after the first  
 205 heating process due to the temperature gradient. The average sample temperature after  
 206 cooling would be higher than the initial temperature, as shown in Fig. S9a. Our recent  
 207 work showed that the higher cold-end temperature would lower the  $dT/dt$ ,<sup>8</sup> which leads  
 208 to lower  $dT/dt$  during cooling for all the samples.

### 209 4.3. Calculation of average magnetization

210 The magnetization of each part can be obtained according to the  $M-T$  curves (Fig.  
 211 2b-2d) and the  $T-t$  curves (Fig. S8). Fig. S10 shows the calculated magnetization of  
 212 each part as a function of time. For Co12.5 and Co14 alloys, the magnetization during  
 213 heating increases rapidly at first, corresponding to the FOMT from weak magnetic  
 214 martensite to FM austenite. Then, the magnetization decreases slowly due to the SOMT  
 215 from the FM to the PM states. During the cooling process, the magnetization increases

216 fast in the beginning due to the reversible SOMT, followed by a gradual decrease of  
 217 magnetization, which is attributed to the FOMT from FM austenite to a weak-magnetic  
 218 martensite. It is noted that, although the  $\Delta M$  during the SOMT is lower than the one  
 219 during the FOMT, the faster  $dT/dt$  at the beginning of cooling makes a faster change of  
 220 magnetization during the SOMT than the one during the followed FOMT. Hence,  
 221 unlike the MCE, which is mainly related to  $dM/dT$ ,  $dT/dt$  also plays an important role  
 222 in the TMG according to  $V \propto (dM/dT)(dT/dt)$ .

223 The magnetization of the surface changes faster than that of the interior, which is  
 224 also due to the faster temperature change of the surface, as shown in Fig. S8. For  
 225 NiMnIn, it experiences a reversible SOMT during the heating and cooling processes,  
 226 but the average magnetization changes faster during heating than during cooling. The  
 227  $T_C = 316$  K of NiMnIn is closer to the cold-end temperature (289 K), and so the  
 228 magnetic transition occurs earlier during heating than cooling. Accordingly,  
 229 magnetization changes faster at the beginning of the heating process.

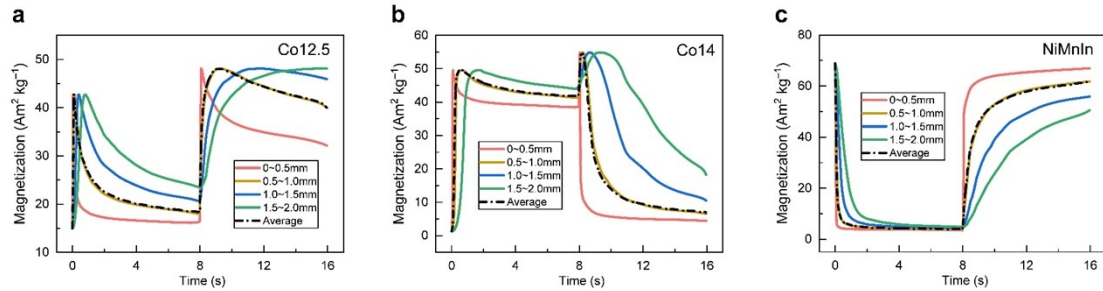

230  
 231 **Fig. S10** The calculated magnetization of each part as a function of time for (a) Co12.5, (b) Co14,  
 232 and (c) NiMnIn, respectively.

#### 233 4.4 Heat transfer during TMG operation

234 Fig. S11 shows the infrared heat map of the copper cabin and the water pipe during  
 235 heating and cooling. During the heating process (Fig. S11a), the copper cabin and the  
 236 sample absorb heat from the hot water, hence, the temperature of the outlet pipe (M3:  
 237 350.2 K) is lower than that of inlet pipe (M1: 353.2 K). On the contrary, the cold water  
 238 removed heat from the copper cabin and the sample during the cooling process (Fig.  
 239 S11b), causing the temperature of the outlet pipe (M3: 302.5 K) to be slightly higher  
 240 than that of the inlet pipe (M1: 300.7 K).

241 The heat absorbed or released by water  $Q_{\text{water}}$  can be expressed by the following

242 equation:

$$243 \quad Q_{\text{water}} = cm(T_2 - T_1) \quad (S7)$$

244 where  $c$  is the specific heat capacity of water,  $m$  is the mass of the water flowing through  
245 the copper cabin, and  $T_1$ ,  $T_2$  are the initial and final temperatures of water. The heat  
246 released by water during heating is 4.03 kJ, and the absorbed heat during cooling is  
247 2.42 kJ, which is lower than the released heat during heating. This fact indicates that a  
248 certain amount of residual heat remains in the sample cabin and is not absorbed by cold  
249 water during cooling, which would then lower the  $dT/dt$  during cooling.

250 In addition, the copper cabin temperature (M2) is lower or higher than the pipe  
251 temperatures (M1, M3). This is likely due to the shielding of the thermal radiation of  
252 the sample cabin during the measurement of infrared camera. To visually display the  
253 temperature change of each water pipe during heating and cooling, we attached Nos. 1,  
254 2, and 3 temperature patches on the cold water pipe, hot water pipe, and common pipe,  
255 respectively. The color change of the temperature patch on each pipe is shown in the  
256 inset of Fig. S11.

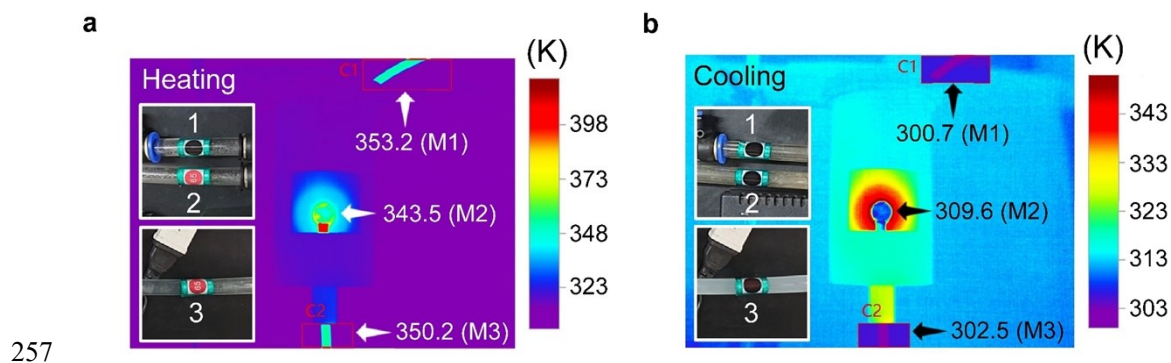

258 **Fig. S11** Temperature change of the copper cabin and water pipe during (a) heating and (b) cooling  
259 process photographed by infrared thermal imager. The inlet pipe (C1) and outlet pipe (C2) areas  
260 had been temperature corrected. The inset shows the color change of temperature patch on the cold  
261 water pipe (1), hot water pipe (2), and confluent pipe (3), respectively.

262 When the temperature exceeds 338 K, the temperature patch will change from  
263 black to red. Pipe (1) is the cold water pipe, and it is always black. Pipe (2) is the hot  
264 water pipe, which turns to red when hot water is pumped through it. The confluent pipe  
265 (3) flows hot and cold water alternately during the heating and cooling processes, so it  
266 alternately turns red and black.

## 267 **Supplementary Note 5. The induced voltage $V$ within 300 s**

268 Fig. S12 shows the experimental voltage generated by our TMG device within 300  
269 s for all the alloys. Both Co12.5 and Co14 alloys produce two  $V$  peaks in each  
270 heating/cooling cycle due to the successive FOMT and SOMT, while NiMnIn only  
271 generates one  $V$  peak generated by SOMT. All the alloys generate AC electricity during  
272 the continuous cycles, suggesting the stable power generation performance of our  
273 TMG.

274 The total voltage ( $V_{\text{tot}}$ ) within 300 s for Co12.5, Co14, and NiMnIn are 1.82, 2.68,  
275 and 2.68  $\text{V g}^{-1}$ , respectively. Although the TMG property is only contributed by the  
276 SOMT in NiMnIn rather than Co12.5 and Co14 in which both FOMT and SOMT  
277 contribute to the TMG property, NiMnIn shows the highest  $V_{\text{tot}}$  among all the alloys.

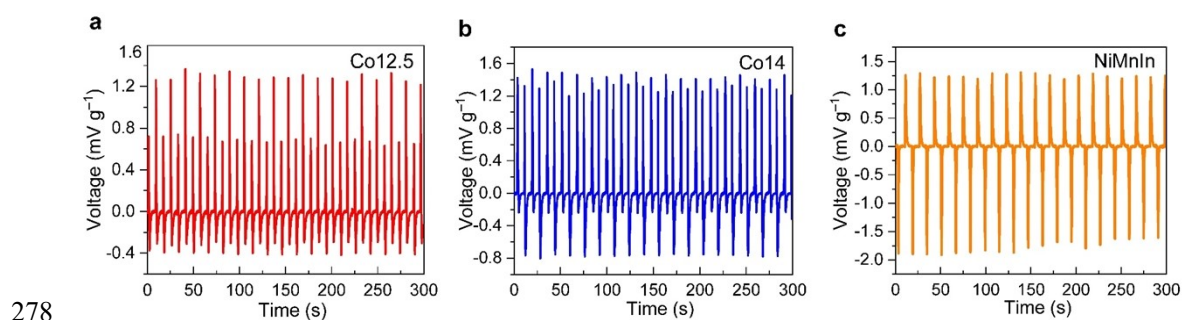

279 **Fig. S12** The experimental induced voltage within 300 s for (a) Co12.5, (b) Co14, and (c) NiMnIn,  
280 respectively.

## 281 **Supplementary Note 6. Finite element simulation**

282 The TMG performance of the studied alloys was also investigated using finite  
283 element simulations by the COMSOL Multiphysics software (Version 5.4). The  
284 magnetic field (MF) module as well as solid and fluid heat transfer module (HT) in  
285 AC/DC were selected, and then the simulation process was carried out by the following  
286 steps:

287 Step 1: Build the model of the device with the size parameters as input (Table S1).

288 Step 2: Input the parameters of the TMG materials including density (in the  
289 “Methods” section), change of magnetization with temperature (Fig. 2b-2d), heat  
290 capacity (Fig. S5), thermal conductivity (Fig. S6), and the parameters of the permanent

291 magnet (Table S1).

292 Step 3: Employ the heat transfer module of COMSOL to simulate the variation of  
293 sample temperature during the cycling, i.e.,  $T-t$  curves.

294 Step 4: Employ the magnetic field module to calculate the value of  $B$  as a function  
295 of time based on the above simulated  $T-t$  curves and the experimental  $M-T$  curves (Fig.  
296 2b-2d).

297 Step 5: The COMSOL simulates the induced voltage  $V$  based on the rate of change  
298 of  $B$  according to equation (1) in the main text.

### 299 **Supplementary Note 7. The experiment of lighting up the LEDs**

300 By utilizing this high TMG performance, we successfully lit up the commercial  
301 LEDs using our TMG device. Fig. S13 shows the circuit diagram of the experiment of  
302 lighting up the LEDs, when the TMG device generates positive current (Fig. S13a) and  
303 negative current (Fig. S13b), respectively. The output end of the TMG device was  
304 connected to an amplifier circuit (Circuit 1: yellow part), and the voltage regulator  
305 circuit with external power supply was connected to the amplifier circuit to provide the  
306 amplifier circuit with the energy required for amplification. As shown in Circuit 2 (blue  
307 part), two LEDs in opposite directions were connected in parallel at the output end of  
308 the amplifier circuit.

309 When the TMG device generates positive current, the red LED 1 conducts current  
310 with a forward bias and it is turned ON, while the green LED 2 is OFF with a reverse  
311 bias due to the unidirectional conduction characteristic of the diode (Fig. S13a).  
312 Similarly, when the TMG device generates negative current, the red LED 1 is turned  
313 off and the green LED 2 is lit (Fig. S13b).

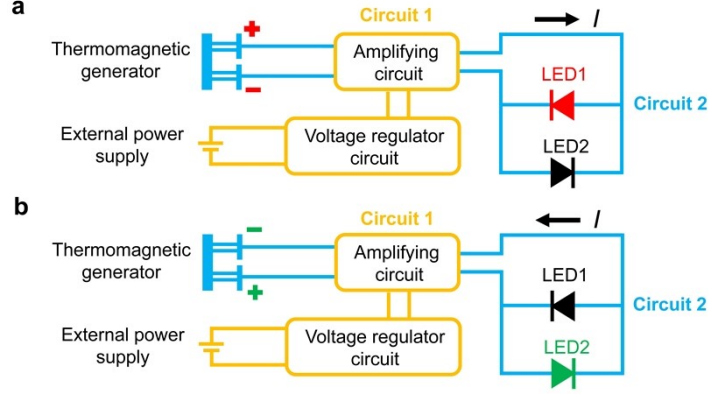

314

315 **Fig. S13** The circuit diagram of the experiment of lighting up the LEDs, when the TMG generates  
 316 (a) positive current and (b) negative current, respectively.

317 **Supplementary Note 8. Relative energy conversion efficiency ( $\eta_{rel}$ ) and**  
 318 **the power density ( $P_D$ )**

319 The relative energy conversion efficiency ( $\eta_{rel}$ ) represents the ability of the Heusler  
 320 alloys to convert thermal energy into electric energy during heating, which can be  
 321 defined as the following equation:<sup>9</sup>

322 
$$\eta_{rel} = \frac{\eta_{abs}}{\eta_{Carnot}} = \frac{\eta_{abs}}{1 - \frac{T_c}{T_h}} \quad (S8)$$

323 where  $\eta_{Carnot} = 1 - T_c/T_h$  is the Carnot efficiency,  $T_c$  and  $T_h$  are the cold-end and hot-end  
 324 temperatures, respectively. For our lab-built TMG device, the  $T_c$  and  $T_h$  are 289 K and  
 325 369 K, respectively, so the  $\eta_{Carnot}$  is 21.68%.  $\eta_{abs}$  is the absolute efficiency, which can  
 326 be defined as:<sup>9</sup>

327 
$$\eta_{abs} = \frac{E_{out}}{Q_{in}} \quad (S9)$$

328 where  $E_{out}$  is the net gain electric energy, which is expressed as:

329 
$$E_{out} = \mu_0 H \Delta M \quad (S10)$$

330 where  $\mu_0 H = 1$  T,  $\Delta M$  is the magnetization change between  $T_c$  and  $T_h$ , and  $Q_{in}$  is the  
 331 thermal energy absorbed by the sample, which is given by the following equation:<sup>10-13</sup>

332 
$$Q_{in} = \rho \int_{T_c}^{T_h} C_P(T) dT \quad (S11)$$



333 where  $\rho$  is the density of sample,  $C_p(T)$  is the heat capacity of sample. The  $Q_{in}$  is  
 334 determined by integrating the  $C_p-T$  curves in the working temperature range, as shown  
 335 in the shaded area in Fig. S14a-S14c. The blue region is the  $Q_{in}$  absorbed by the sample  
 336 during the FOMT, and the yellow region is the  $Q_{in}$  during the SOMT.

337 The thermal energy  $Q_{in}$  absorbed by the Heusler alloys during heating is  
 338 summarized in Fig. S14d. The total  $Q_{in}$  values of Co12.5, Co14, and NiMnIn alloys are  
 339 44.72 kJ kg<sup>-1</sup>, 53.57 kJ kg<sup>-1</sup>, and 35.57 kJ kg<sup>-1</sup>, respectively. NiMnIn alloy shows the  
 340 lowest  $Q_{in}$ . According to equation (S9), this low  $Q_{in}$  of NiMnIn is favorable for higher  
 341  $\eta_{abs}$  and  $\eta_{rel}$ .

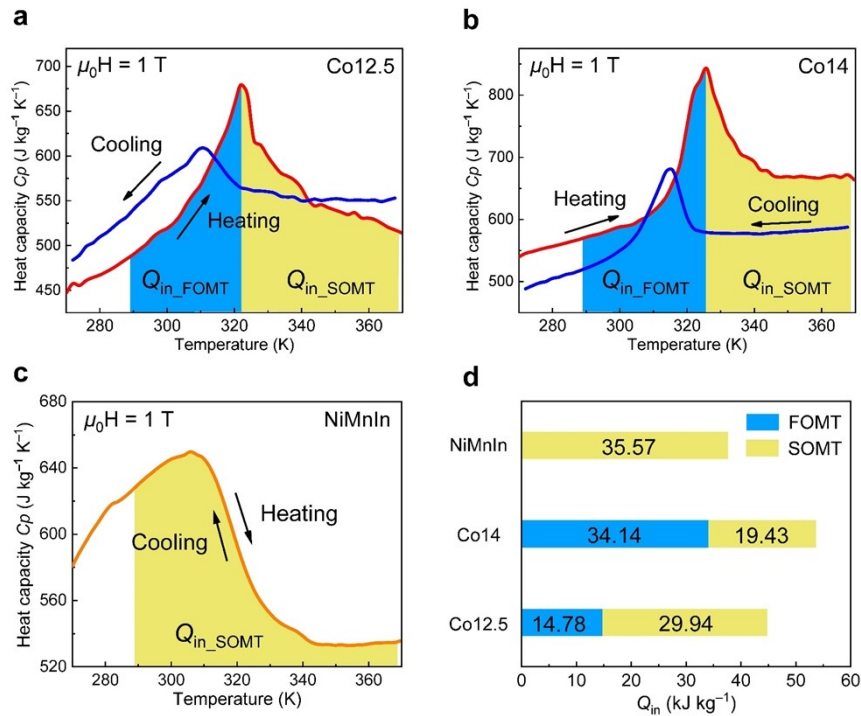

342  
 343 **Fig. S14** The calculation of  $Q_{in}$  based on  $C_p-T$  curves under 1 T for (a) Co12.5, (b) Co14, and (c)  
 344 NiMnIn, respectively. (d) The thermal energy  $Q_{in}$  absorbed by Heusler alloys during heating.

345 Fig. S15 compares the magnetization change  $\Delta M$  during different phase transitions  
 346 in the heating process for all the alloys. For Co12.5 alloy, the  $\Delta M$  during FOMT and  
 347 SOMT is 28 Am<sup>2</sup> kg<sup>-1</sup> and 28 Am<sup>2</sup> kg<sup>-1</sup>, respectively. For Co14 alloy, the  $\Delta M$  during  
 348 FOMT and SOMT is 49 Am<sup>2</sup> kg<sup>-1</sup> and 13 Am<sup>2</sup> kg<sup>-1</sup>, respectively. On the other hand,  
 349 NiMnIn shows a high  $\Delta M$  of 67 Am<sup>2</sup> kg<sup>-1</sup> during the SOMT in the working temperature,  
 350 which is even higher than the total  $\Delta M$  values of both FOMT and SOMT for Co12.5  
 351 (56 Am<sup>2</sup> kg<sup>-1</sup>) and Co14 (62 Am<sup>2</sup> kg<sup>-1</sup>) alloys. The higher  $\Delta M$  value of NiMnIn is also

352 beneficial to obtain higher  $\eta_{\text{abs}}$  and  $\eta_{\text{rel}}$  according to the above equations.

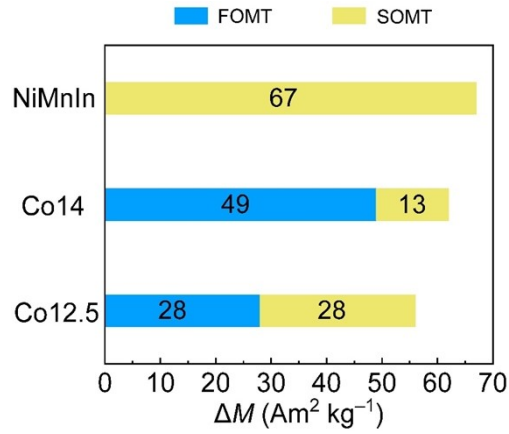

353

354 **Fig. S15** The magnetization change  $\Delta M$  during different phase transitions in the heating process for  
 355 all the alloys.

356 Furthermore, the power density  $P_D$  evaluates the output electric power produced  
 357 by a unit volume of Heusler alloys.<sup>12, 14</sup> The maximum power density  $P_{D-\text{max}}$  and  
 358 average power density  $P_{D-\text{ave}}$  can be calculated as:

359 
$$P_{D-\text{max}} = \frac{E_{\text{max}}^2}{RV} \quad (\text{S12})$$

360 
$$P_{D-\text{ave}} = \frac{\int_0^t V(t)^2 dt}{RVt} \quad (\text{S13})$$

361 where  $E_{\text{max}}$  is the maximum induced voltage,  $R$  is the total resistance of system,  $V$  is the  
 362 volume of sample,  $V(t)$  is the voltage variation over time  $t$ . NiMnIn alloy has the highest  
 363  $P_{D-\text{max}}$  (1752.3 mW m<sup>-3</sup>), which is 3.3 and 1.6 times that of Co12.5 alloy (892.1 mW  
 364 m<sup>-3</sup>) and Co14 alloy (1112.7 mW m<sup>-3</sup>). Besides, NiMnIn alloy also has the highest  $P_{D-\text{ave}}$   
 365 (0.50 μW cm<sup>-3</sup>), which is 3.3 and 1.6 times that of Co12.5 alloy (0.15 μW cm<sup>-3</sup>) and  
 366 Co14 alloy (0.32 μW cm<sup>-3</sup>). This is mainly due to the highest  $V$  of the NiMnIn alloy  
 367 and the long peak duration time  $t$  as shown in Fig. 3a-3c in the main text.

### 368 **Supplementary Note 9. Cost of the raw materials (C)**

369 Fig. S16 shows the cost price of the raw materials obtained from Beijing Jiaming  
 370 Platinum Nonferrous Metals Co., Ltd. in 2023. The purity of Ni, Co, Mn, Ti, and In is

371 99.995 wt%, 99.98 wt%, 99.2 wt%, 99.995 wt%, and 99.995 wt%, respectively. The  
 372 cost index ( $C_0$ ), which is defined as  $P_{D-max}/C$ , is used to evaluate the output power per  
 373 unit price. Here, we did not include the costs of processing and shaping in the present  
 374 analysis, as these costs depend on the scale of production. NiMnIn shows a relatively  
 375 higher  $C_0$  of  $2.78 \mu\text{W } \text{€}^{-1}$  than that of Co12.5 ( $1.94 \mu\text{W } \text{€}^{-1}$ ) and Co14 ( $2.43 \mu\text{W } \text{€}^{-1}$ ),  
 376 which is mainly due to the highest  $P_{D-max}$  and low cost of NiMnIn alloy. Furthermore,  
 377 compared with other different material classes, as shown in Fig. 4g in the main text, the  
 378  $C_0$  of  $\text{Ni}_2\text{Mn}_{1.4}\text{In}_{0.6}$  is 1–4 orders of magnitude higher than those of other typical  
 379 reported materials.

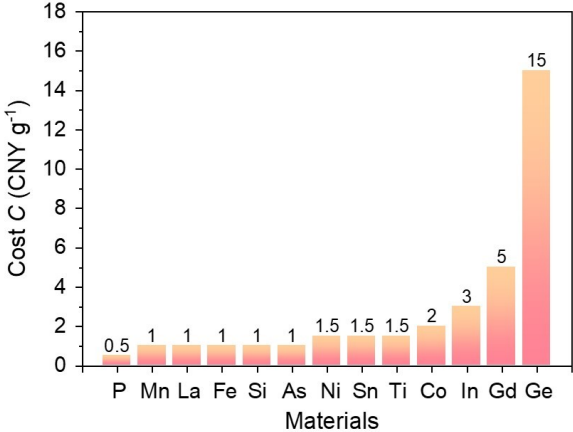

380  
 381

**Fig. S16** The costs of raw materials in this study.

382 **Supplementary Note 10. Microstructure after long-term TMG service**

383 Fig. S17 shows the SEM image of surface morphology for Heusler alloys after 450  
 384 heating and cooling cycles. Both Co12.5 alloy and NiMnIn alloy do not show any  
 385 cracks, but Co14 alloy develops obvious cracks after 450 cycles. This failure of Co14  
 386 alloy in long-term service is verified again in another Co14 sample (Co14-2). Since the  
 387 EDS maps have proved the uniform element distribution, the cracks are not caused by  
 388 inhomogeneous composition. The fracture of Co14 is caused by the accumulation of  
 389 dislocation and internal stress during the repetitive FOMT. In contrast, NiMnIn  
 390 undergoes a SOMT, and so presents superior service life without any cracks even after  
 391 1300 cycles.

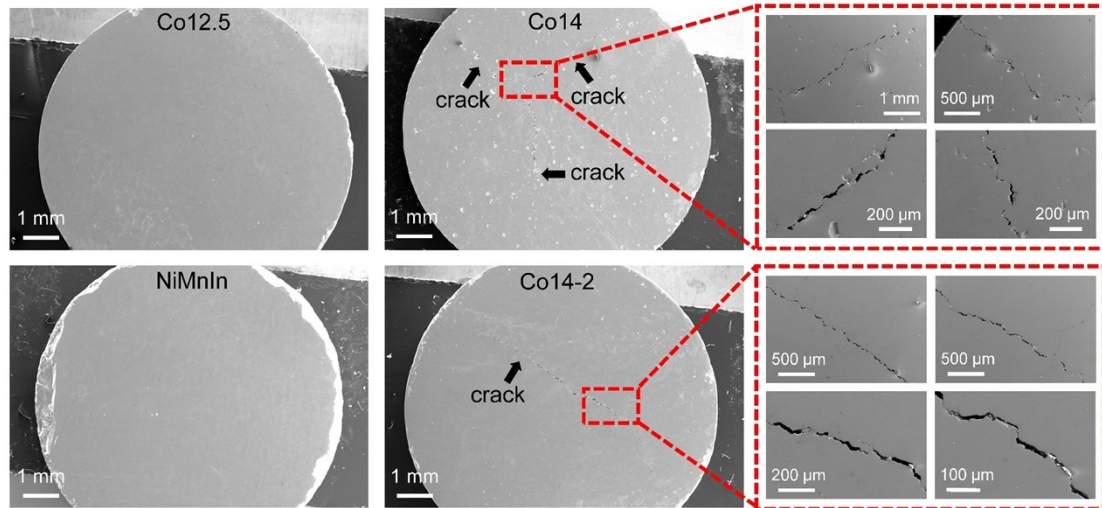

392  
 393 **Fig. S17** The SEM image of surface morphology for Heusler alloys after 450 heating and cooling  
 394 cycles.

395 Fig. S18 shows the scanning electron microscopy (SEM) images and the energy-  
 396 dispersive spectroscopy (EDS) maps for all the Heusler alloys. The EDS maps reveals  
 397 that the element distribution of all the alloys is uniform.

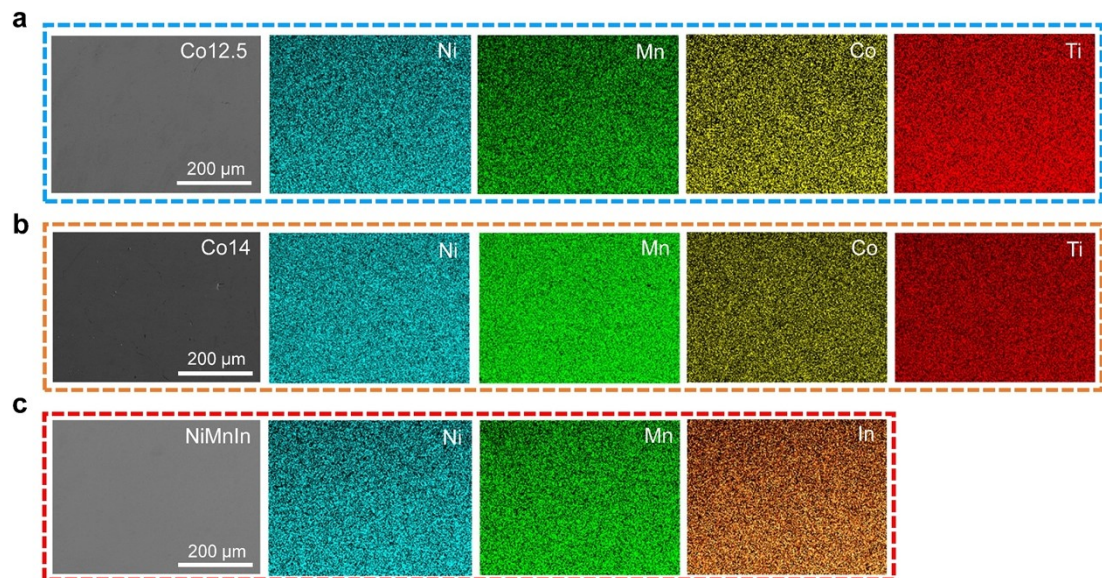

398  
 399 **Fig. S18** The SEM images and EDS maps for (a) Co12.5, (b) Co14, and (c) NiMnIn, respectively.

400 To further verify the long-term stability of SOMT NiMnIn material, we built a  
 401 cycle life test device and further extended the cycling time to 1 month (120,000 cycles).  
 402 Fig. S19a shows the cycle life test device. The sample is fixed on the rod of a slide rail,  
 403 and it can move up and down cyclically. A Peltier patch of  $\sim 288$  K is placed above as  
 404 the heat sink, while a constant temperature water bath of  $\sim 363$  K is placed below as the

405 heat source. The sample will be held for 3 s at each heating/cooling end in order to  
 406 ensure the completion of the phase transition. As shown in Movie S4 (ESI†), the  
 407 cooling and heating cycle of the sample was realized through the reciprocating motion  
 408 of slide rail. As shown in Fig. S19b, SOMT NiMnIn material showed no cracks and  
 409 maintained good cycling stability after 0, 1, 2, 3, 7, 14, 21, and 30 days of heating and  
 410 cooling cycles. We also compared the SEM of the initial state and after 30 days (up to  
 411 120,000 cycles), and found that there is no significant difference between them (Fig.  
 412 S19c). More importantly, we also tested the  $V-t$  curves of NiMnIn alloy after 0, 7, 14,  
 413 21, and 30 days, respectively, as shown in Fig. S19d. It shows that NiMnIn alloy  
 414 maintains a very constant TMG performance, proving the excellent cycle stability of  
 415 NiMnIn alloy with SOMT.

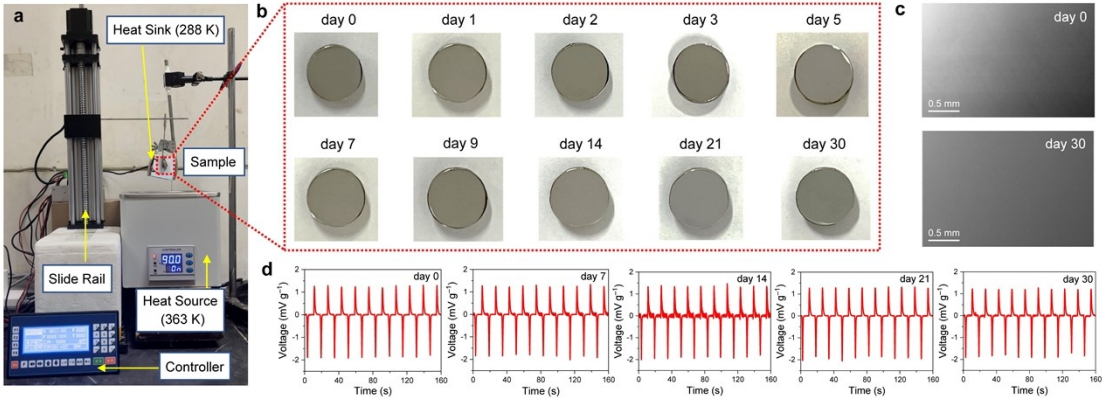

416  
 417 **Fig. S19** (a) The cycle life test device. (b) The surface morphology of NiMnIn alloy after 0, 1, 2, 3,  
 418 7, 14, 21, and 30 days of heating and cooling cycles. (c) The SEM image of initial state and after 30  
 419 days of cooling and heating cycles of NiMnIn alloy. (d) The  $V-t$  curves of NiMnIn alloy after 0, 7,  
 420 14, 21, and 30 days of heating and cooling cycles.

421 **Supplementary Note 11. Comparison between present work and other**  
 422 **typical active TMGs**

423 We summarized and compared the device and material parameters of our present  
 424 work and other typical works based on the active TMG devices with traditional  
 425 magnetic circuit, as shown in Table S2. The device parameters mainly include the  
 426 temperature span  $\Delta T$ , the total resistance of system  $R$ , the magnetic field  $H$  and the  
 427 number of coil turns  $\omega$ . The materials parameters mainly include the volume of sample  
 428  $V$ , the magnetization change during one cycle  $\Delta M$ , the heat absorbed during one heating

429 process  $Q_{\text{in}}$ , the density of sample  $\rho$ , the experimental current density  $I_0$ , the maximum  
430 power density  $P_{\text{D-max}}$ , the average power density  $P_{\text{D-ave}}$ , and the relative energy  
431 conversion efficiency  $\eta_{\text{rel}}$ .

432 Among them, parameters  $\Delta T$ ,  $R$ ,  $H$ ,  $\omega$ ,  $V$ ,  $\Delta M$ ,  $\rho$ , and  $I_0$  are all taken directly from  
433 the corresponding references,  $Q_{\text{in}}$  is calculated by equation (S11),  $P_{\text{D-max}}$  is calculated  
434 by equation (S12),  $P_{\text{D-ave}}$  is calculated by equation (S13),  $\eta_{\text{rel}}$  is calculated by equation  
435 (2) in the main text, and  $PGI$  is calculated by equation (4) in the main text. The  
436 comparison results show that our SOMT NiMnIn material has the highest  $P_{\text{D-max}}$   
437 ( $1752.3 \text{ mW m}^{-3}$ ) and  $C_0$  ( $2.78 \text{ }\mu\text{W }\epsilon^{-1}$ ), which is 1–5 and 1–4 orders of magnitude  
438 higher than those of most typical reported materials, respectively. In addition, we  
439 proposed a new systematic comparison index, power generation index ( $PGI$ ), which  
440 takes into account the factors from both material and device that influence the induced  
441 current. So, it can eliminate the comparison errors caused by various non-intrinsic  
442 factors and is more reasonably to compare the TMG performance of different materials.  
443 The  $PGI$  of NiMnIn is 1–7 orders of magnitude higher than those of other typical  
444 reported materials. Consequently, the SOMT NiMnIn material shows an excellent  
445 comprehensive TMG performance in comparison with other typical works based on the  
446 active TMG devices with traditional magnetic circuit.

## 447 **Supplementary Tables**

448 **Table S1** Relevant parameters for finite element simulations.

| <b>Parameter</b>                              | <b>Value</b> | <b>Unit</b>        |
|-----------------------------------------------|--------------|--------------------|
| Initial test temperature                      | 289          | K                  |
| Cold fluid temperature                        | 289          | K                  |
| Hot fluid temperature                         | 369          | K                  |
| Fluid velocity                                | 0.04         | L s <sup>-1</sup>  |
| Time of one cycle                             | 16           | s                  |
| Turns of the coil                             | 600          |                    |
| Inside radius of the coil                     | 0.97         | cm                 |
| Outside radius of the coil                    | 2.31         | cm                 |
| Length of the coil                            | 1.24         | cm                 |
| Diameter of the wire                          | 0.04         | cm                 |
| Inside radius of the permanent magnet         | 4.4          | cm                 |
| Outside radius of the permanent magnet        | 11.2         | cm                 |
| Height of the permanent magnet                | 20           | cm                 |
| Applied magnetic field                        | 1            | T                  |
| Resistance of the coil                        | 6.7          | Ω                  |
| Coercivity of the permanent magnet            | 1037         | kA m <sup>-1</sup> |
| Relative permeability of the permanent magnet | 1.056        |                    |

450 **Table S2** Comparison of the device and materials parameters of this work with other works based on the active TMG devices with traditional magnetic circuit. The  
451 device parameters include the temperature span  $\Delta T$ , the total resistance of system  $R$ , the magnetic field  $H$  and the number of coil turns  $\omega$ . The materials parameters  
452 include the volume of sample  $V$ , the magnetization change during one cycle  $\Delta M$ , the heat absorbed during one heating process  $Q_{in}$ , the density of sample  $\rho$ , the current  
453 density  $I_0$ , the power generation index  $PGI$ , the maximum power density  $P_{D-max}$ , the average power density  $P_{D-ave}$ , and the relative energy conversion efficiency  $\eta_{rel}$ .

| Alloy <sup>Ref</sup>                                                          | $\Delta T$<br>(K) | $R$<br>( $\Omega$ ) | $H$<br>(T) | $\omega$ | $V$<br>( $\text{cm}^{-3}$ ) | $\Delta M$<br>( $\text{Am}^2 \text{kg}^{-1}$ ) | $Q_{in}$<br>( $\text{kJ kg}^{-1}$ ) | $\rho$<br>( $\text{kg m}^{-3}$ ) | $I_0$<br>( $\mu\text{A g}^{-1}$ ) | $PGI$<br>$\times 10^{-6}$ | $P_{D-ave}$<br>( $\text{mW m}^{-3}$ ) | $P_{D-max}$<br>( $\text{mW m}^{-3}$ ) | $\eta_{rel}$<br>$\times 10^{-4}$ (%) |
|-------------------------------------------------------------------------------|-------------------|---------------------|------------|----------|-----------------------------|------------------------------------------------|-------------------------------------|----------------------------------|-----------------------------------|---------------------------|---------------------------------------|---------------------------------------|--------------------------------------|
| $\text{Ni}_2\text{Mn}_{1.4}\text{In}_{0.6}$                                   | 80                | 6.7                 | 1          | 600      | 0.314                       | 67                                             | 35.57                               | 7935                             | 286.57                            | 891.08                    | 500.68                                | 1752.26                               | 1.09                                 |
| $(\text{Mn, Fe})_2(\text{P, As})$ <sup>15</sup>                               | 16                | 47.02               | 0.24       | 240      | 4.89                        | n/a                                            | n/a                                 | n/a                              | 5.53                              | 127.61                    | 9.90                                  | 53.28                                 | n/a                                  |
| Phytherm 55 alloy <sup>16</sup>                                               | 60                | 102.2               | 0.4        | 400      | 1.925                       | 32                                             | 25.20                               | 8100                             | 76.92                             | 78.40                     | 0.97                                  | 7.32                                  | 0.33                                 |
| $\text{Ni}_{45}\text{Co}_5\text{Mn}_{40}\text{Sn}_{10}$ <sup>17</sup>         | 300               | 10000               | 0.2        | 2000     | 0.375                       | 137.5                                          | 129.00                              | 8000                             | 0.02                              | $1.67 \times 10^{-5}$     | 0.03                                  | 0.10                                  | 0.06                                 |
| Gd-1 <sup>8</sup>                                                             | 85                | 15                  | 1.3        | 300      | 0.786                       | 67                                             | 23.49                               | 7610                             | 22.58                             | 45.41                     | 52.16                                 | 471.25                                | 2.07                                 |
| Gd-2 <sup>2</sup>                                                             | 65                | 15                  | 1          | 300      | 0.786                       | 42                                             | 15.62                               | 7610                             | 4.82                              | 16.48                     | 0.10                                  | 31.72                                 | 1.92                                 |
| $\text{La}(\text{Fe, Si})_{13}\text{H}_y/\text{In}$ <sup>2</sup>              | 65                | 15                  | 1          | 300      | 0.786                       | 59                                             | 25.23                               | 6500                             | 9.12                              | 31.18                     | 0.42                                  | 53.05                                 | 1.95                                 |
| $\text{Gd}_5(\text{Si, Ge})_4$ <sup>1</sup>                                   | 65                | 15                  | 1          | 300      | 0.786                       | 50                                             | 25.48                               | 7010                             | 4.28                              | 14.63                     | 0.13                                  | 21.22                                 | 1.52                                 |
| $\text{Ni}_{50}\text{Mn}_{34}\text{Co}_2\text{Sn}_{14}$ <sup>1</sup>          | 65                | 15                  | 1          | 300      | 0.786                       | 26                                             | 26.95                               | 7960                             | 2.37                              | 8.10                      | 0.05                                  | 8.39                                  | 0.66                                 |
| $\text{Mn}_{1.2}\text{Fe}_{0.8}\text{P}_{0.4}\text{Si}_{0.6}$ <sup>18</sup>   | ~70               | 167.2               | 0.553      | 1500     | 10.33                       | 20                                             | 35.82                               | 4842                             | 1.3                               | 0.13                      | n/a                                   | 68.39                                 | 0.32                                 |
| $\text{Mn}_{1.2}\text{Fe}_{0.8}\text{P}_{0.35}\text{Si}_{0.65}$ <sup>19</sup> | ~90               | ~105                | 0.8        | 2700     | 26.64                       | 17.5                                           | 46.06                               | 4879                             | 0.62                              | 0.03                      | n/a                                   | 25.23                                 | 0.26                                 |
| $\text{Fe}_{62.3}\text{Ni}_{37}\text{Mn}_{0.4}\text{Si}_{0.3}$ <sup>20</sup>  | 10                | 200                 | ~0.3       | 2000     | n/a                         | n/a                                            | n/a                                 | n/a                              | 22.69                             | 18.91                     | n/a                                   | n/a                                   | n/a                                  |



455 **Notes and references**

- 456 1 H. Chen, Z. Ma, X. Liu, K. Qiao, L. Xie, Z. Li, J. Shen, W. Dai, Z. Ou, H. Yibole,  
457 O. Tegus, S. V. Taskaev, K. Chu, Y. Long and H. Zhang, *Appl. Energy*, 2022,  
458 **306**, 117999.
- 459 2 Z. Ma, H. Chen, X. Liu, C. Xing, M. Wu, Y. Wang, P. Liu, Z. Ou, J. Shen, S. V.  
460 Taskaev, K. Long, Y. Long and H. Zhang, *Adv. Sustainable Syst.*, 2021, **5**,  
461 2000234.
- 462 3 D. D. Viehland and E. K. H. Salje, *Adv. Phys.*, 2014, **63**, 267-326.
- 463 4 K. Liu, X. Han, K. Yu, C. Ma, Z. Zhang, Y. Song, S. Ma, H. Zeng, C. Chen, X.  
464 Luo, S. U. Rehman and Z. Zhong, *Intermetallics*, 2019, **110**, 106472.
- 465 5 Z. Wei, E. Liu, J. Chen, Y. Li, G. Liu, H. Luo, X. Xi, H. Zhang, W. Wang and G.  
466 Wu, *Appl. Phys. Lett.*, 2015, **107**, 022406.
- 467 6 T. Krenke, E. Duman, M. Acet, E. F. Wassermann, X. Moya, L. Manosa and A.  
468 Planes, *Nat. Mater.*, 2005, **4**, 450-454.
- 469 7 X. Liu, H. Chen, J. Huang, K. Qiao, Z. Yu, L. Xie, R. V. Ramanujan, F. Hu, K.  
470 Chu, Y. Long and H. Zhang, *Nat. Commun.*, 2023, **14**, 4811.
- 471 8 X. Liu, H. Zhang, H. Chen, Z. Ma, K. Qiao, L. Xie, Z. Ou, J. Wang, F. Hu and B.  
472 Shen, *Appl. Therm. Eng.*, 2023, **221**, 119827.
- 473 9 R. A. Kishore and S. Priya, *Renewable Sustainable Energy Rev.*, 2018, **81**, 33-44.
- 474 10 L. D. Kirol and J. I. Mills, *J. Appl. Phys.*, 1984, **56**, 824-828.
- 475 11 D. Solomon, *J. Appl. Phys.*, 1988, **63**, 915-921.
- 476 12 M. Gueltig, F. Wendler, H. Ossmer, M. Ohtsuka, H. Miki, T. Takagi and M. Kohl,  
477 *Adv. Energy Mater.*, 2017, **7**, 1601879.
- 478 13 Y. T. Song, K. P. Bhatti, V. Srivastava, C. Leighton and R. D. James, *Energy*  
479 *Environ. Sci.*, 2013, **6**, 1315-1327.
- 480 14 M. Gueltig, H. Ossmer, M. Ohtsuka, H. Miki, K. Tsuchiya, T. Takagi and M.  
481 Kohl, *Adv. Energy Mater.*, 2014, **4**, 1400751.
- 482 15 T. Christiaanse and E. Brück, *Metall. Mater. Trans. E*, 2014, **1**, 36-40.
- 483 16 M. Lallart, L. Wang, G. Sebald, L. Petit and D. Guyomar, *Phys. Lett. A*, 2014,  
484 **378**, 3151-3154.
- 485 17 V. Srivastava, Y. Song, K. Bhatti and R. D. James, *Adv. Energy Mater.*, 2011, **1**,  
486 97-104.
- 487 18 L. Bi, O. Tegus, R. Yi and H. Shi, *Acta Phys. Sin.*, 2012, **61**, 077103.
- 488 19 Z. Liu, O. Tegus, Z. Ou, W. Fan, Z. Song, H. Lu, W. Wei and R. Han, *Acta Phys.*  
489 *Sin.*, 2015, **64**, 047103.
- 490 20 J. Liu, Y. Long, D. Bai, H. Sun, H. Zhang, K. Long and T. Yan, *AIP Adv.*, 2019,  
491 **9**, 045227.
- 492
